# Supplementary material for: Enhanced Biodegradation of Phenylurea Herbicides by Ochrobactrum anthrophi CD3 Assessment of Its Feasibility in Diuron-Contaminated Soils
Source: MDPI journal article supplement (doi:10.3390/ijerph19031365), 2022-01-26
Supplement: s1 [file s1]

SUPPLEMENTARY DATA

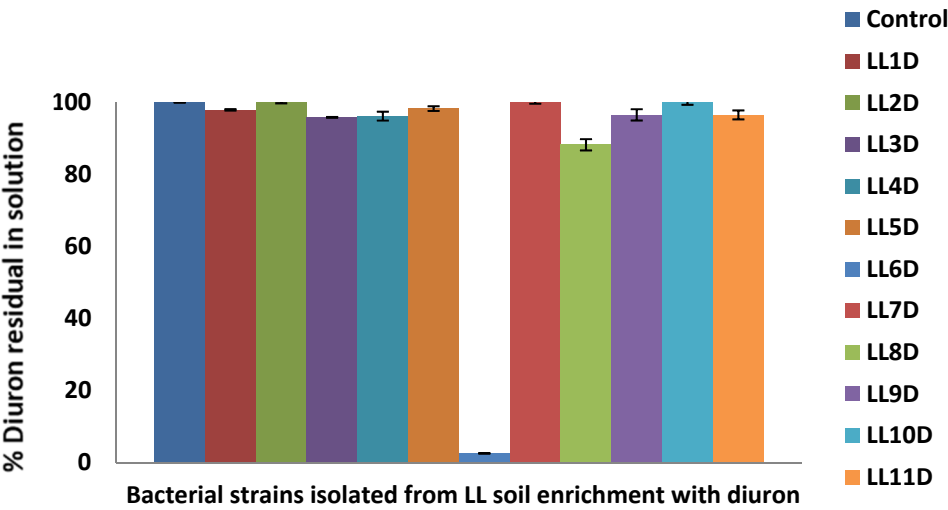

**Figure S1.** Quantification of the diuron degraded in aqueous solution after 20 days by the bacterial strains isolated from an agricultural soil.

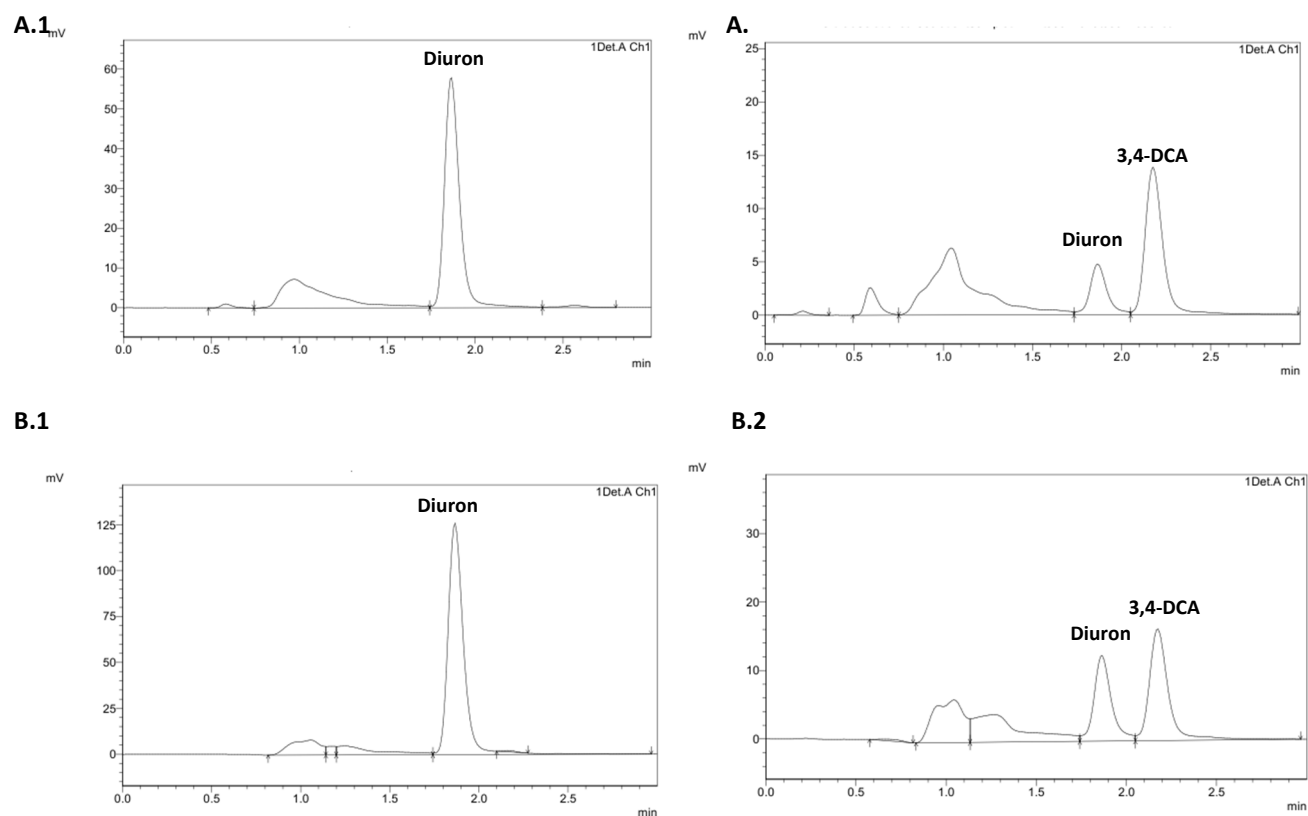

**Figure S2** HPLC chromatograms obtained from the extracts of PLD soil (A.1) and R soil (B.1) after one day of incubation; and from PLD soil (A.2) and R soil (B.2) after eight days of incubation.

**Table S1.** Formulas, molecular structures and some properties of phenylurea herbicides studied in this work (PPDB. IUPAC Pesticides Properties DataBase).

| Name                                                               | Molecular Structure                                                               | Water solubility (mg L <sup>-1</sup> ) | Log K <sub>ow</sub> | K <sub>oc</sub> | Soil degradation DT <sub>50</sub> ** | Environmental fate                        |
|--------------------------------------------------------------------|-----------------------------------------------------------------------------------|----------------------------------------|---------------------|-----------------|--------------------------------------|-------------------------------------------|
| <b>Linuron</b><br>3-(3,4-dichlorophenyl)-1-methoxy-1-methylurea    | 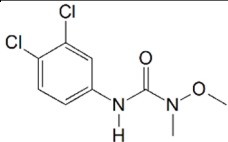 | 63.8                                   | 3.0                 | 843             | 48 / 57.6                            | Moderately persistent/<br>Slightly mobile |
| <b>Diuron</b><br>3-(3,4-dichlorophenyl)-1,1-dimethylurea           |  | 35.6                                   | 2.87                | 680             | 146.6 / 229                          | Persistent                                |
| <b>Chlorotoluron</b><br>3-(3-chloro-p-tolyl)-1,1-dimethylurea      |  | 74                                     | 2.5                 | 196             | -                                    | -                                         |
| <b>Isoproturon</b><br>3-(4-isopropylphenyl)-1,1-dimethylurea       |  | 70.2                                   | 2.5                 | 122*            | 12 / 23                              | Non persistent/<br>Moderately mobile      |
| <b>Fluometuron</b><br>1,1-dimethyl-3-(α,α,α-trifluoro-m-tolyl)urea |  | 111                                    | 2.28                | 67.4*           | 63.6 / 89.8                          | Moderately persistent/Mobile              |

\*K<sub>foc</sub>; \*\*DT<sub>50</sub>: estimated average half-life in soil (lab at 20 °C / field).
